# Supplementary material for: A cyclometalated Pt(ii)–Pt(ii) clamshell dimer with a triplet emission at 887 nm
Source: Royal Society of Chemistry journal article supplement (doi:10.1039/d3dt04335e), 2024-01-01
Supplement: d3dt04335e1.pdf [file d3dt04335e1.pdf]

## Electronic Supplementary Information

### **A cyclometalated Pt(II)-Pt(II) Clamshell Dimer with a Triplet Emission at 887**

**nm**

Lequn Yuan,<sup>a</sup> Haibo Yao,<sup>a,b</sup> Yunjun Shen,<sup>a</sup> Yuzhen Zhang<sup>a\*</sup>

<sup>a</sup> Key Laboratory of Chemistry and Engineering of Forest Products, State Ethnic Affairs Commission, Guangxi Key Laboratory of Chemistry and Engineering of Forest Products, Guangxi Collaborative Innovation Center for Chemistry and Engineering of Forest Products, School of Chemistry and Chemical Engineering, Guangxi University for Nationalities, Nanning 530006, China, Address: No.158, Daxue West Road, Nanning, 530006, Guangxi, China.

<sup>b</sup> Engineering Research Center for Industrial Wastewater Treatment and Reuse of Shandong Province, School of Chemical Engineering and Safety, Binzhou University, Binzhou 256603, Shandong, China.

## Table of Contents

|                                   |    |
|-----------------------------------|----|
| 1. Characterization .....         | 2  |
| 2. Photophysical Properties ..... | 3  |
| 3. NMR and ESI-Mass spectra ..... | 10 |
| 4. Crystal data .....             | 14 |
| 5. References.....                | 25 |

## 1. Characterization

**UV-Vis absorption.** The photophysical rate constants for radiative decay ( $k_r$ ), non-radiative decay ( $k_{nr}$ ) were calculated according to the literature equations<sup>1</sup>:

$$\Phi(PLQY) = k_r \times \tau, \quad \tau = \frac{1}{k_r + k_{nr}}$$

**PMMA film.** 1 mg of sample and 49 mg of polymethyl methacrylate (PMMA) were dissolved in 10 ml of DCM solution. When mixed evenly, take a little of the above solution with a dropper and drop it evenly on the quartz plate. PMMA film containing samples can be obtained after drying to measure its photophysical properties.

**X-ray data collection and structure determination.** Single crystal analysis was performed using a Bruker SMART APEX II X-ray single crystal diffractometer equipped with a Kryo Flex low-temperature system. The structure was solved by ShelXS6, refined using Olex-2 software using full matrix least squares method, and optimized by ShelXL7. The thermal ellipsoids were drawn with a probability level of 30%. For clarity, hydrogen atoms were omitted. The CCDC reference numbers (CCDC: 2309303, 2309304, and 2309305) and data corresponding to each crystal can be obtained free of charge from the Cambridge crystallographic data center at [www.ccdc.cam.ac.uk/](http://www.ccdc.cam.ac.uk/). Their crystal data was listed in Table S1.

## 2. Photophysical Properties

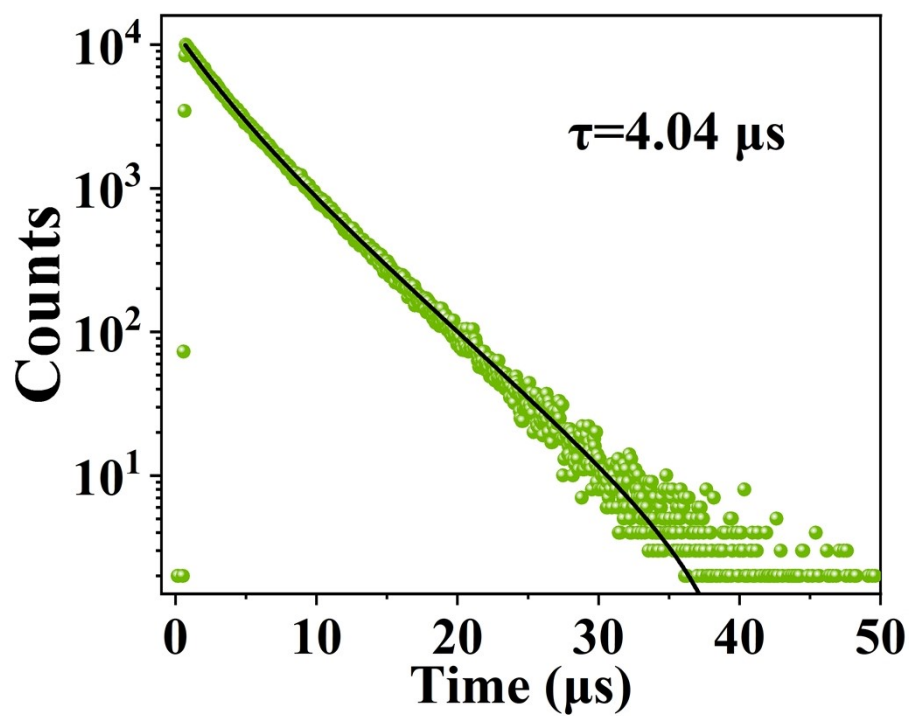

Figure S1. PL decay curves of complex **1a** in deoxygenated  $\text{CH}_2\text{Cl}_2$ .

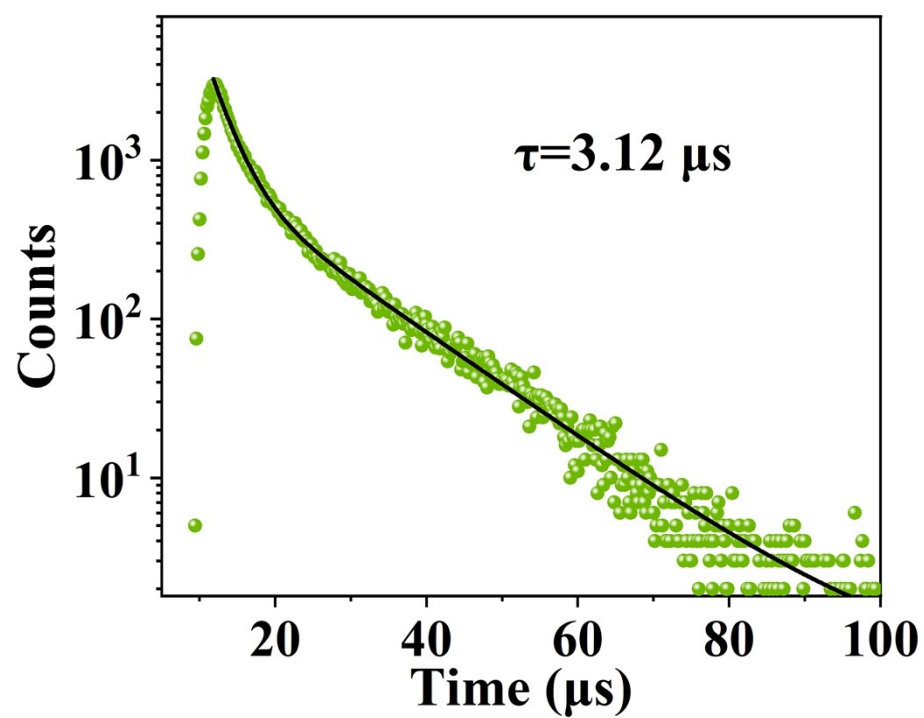

Figure S2. PL decay curves of complex **1a** in solid state.

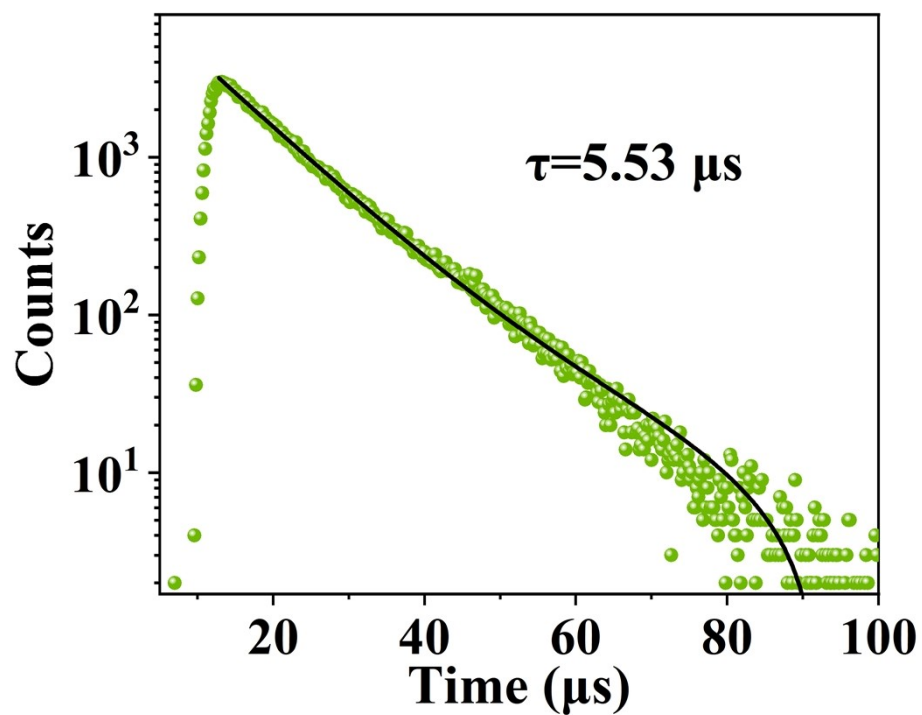

Figure S3. PL decay curves of complex 1a in 2 wt% PMMA films.

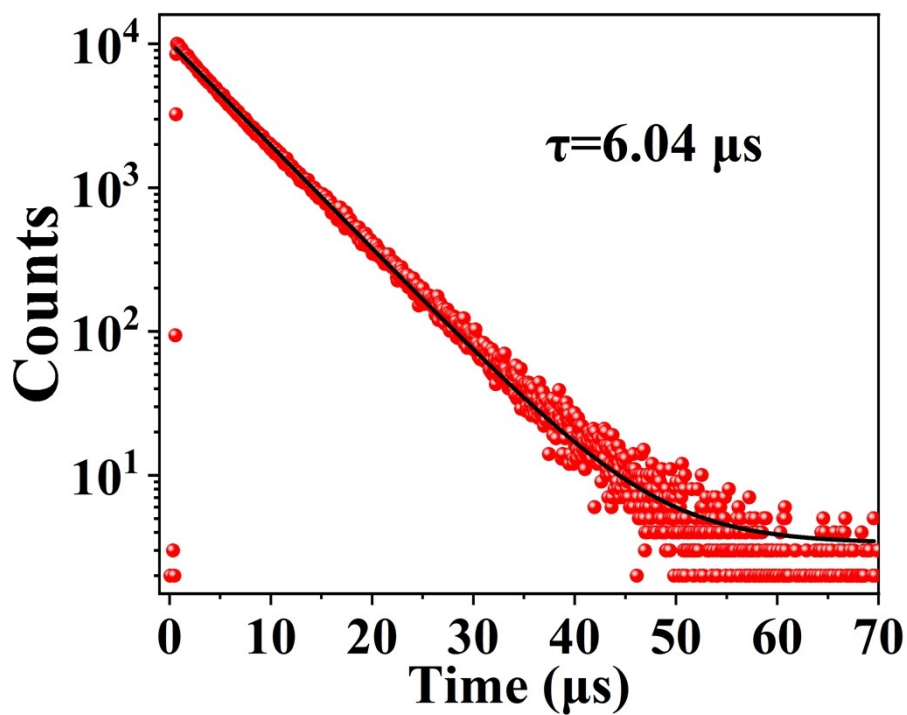

Figure S4. PL decay curves of complex 1b in deoxygenated  $\text{CH}_2\text{Cl}_2$ .

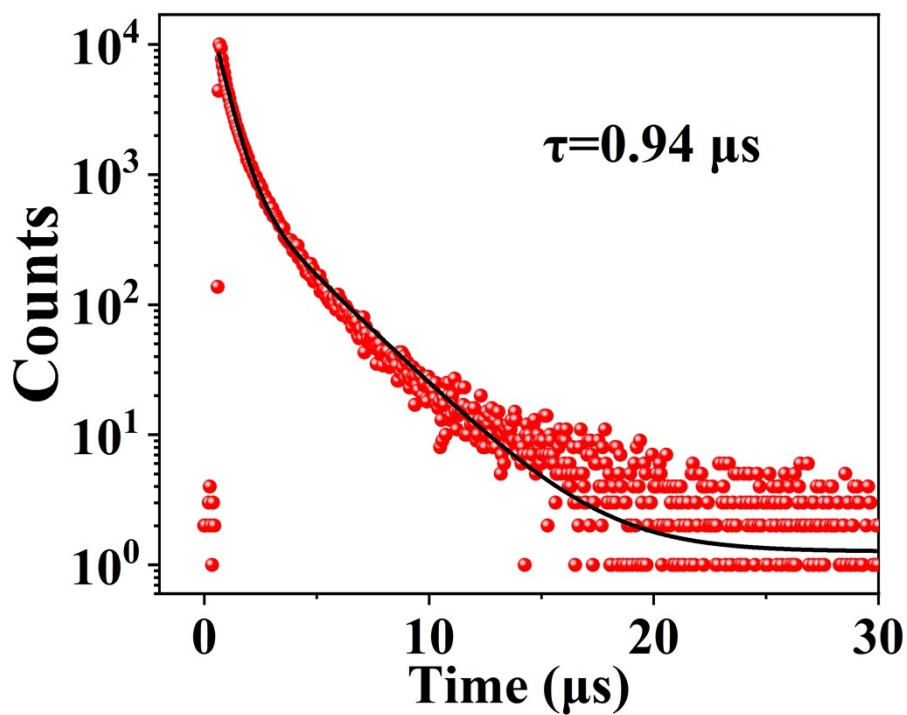

Figure S5. PL decay curves of complex **1b** in solid state.

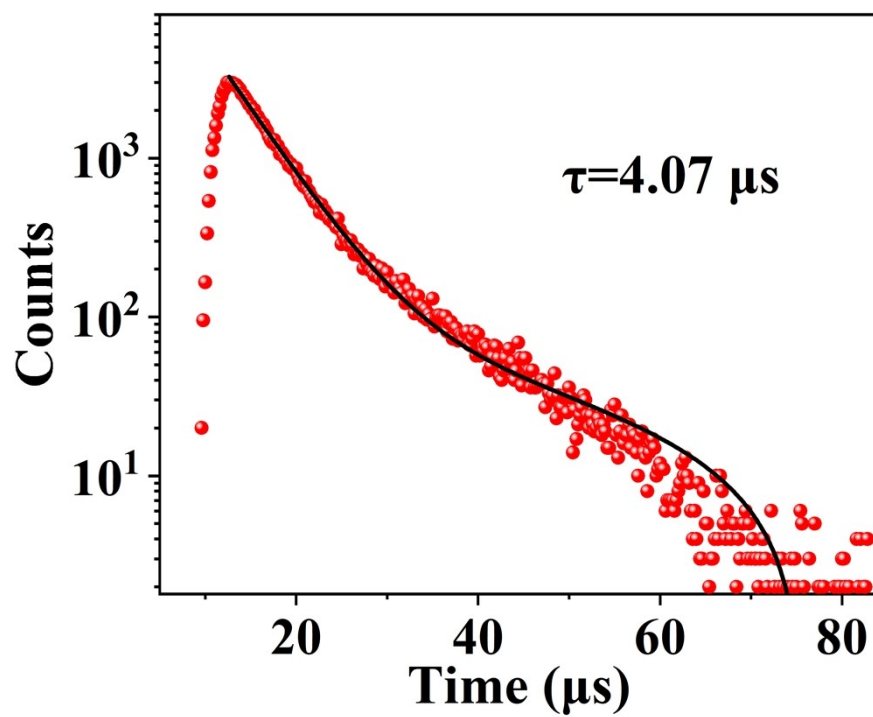

Figure S6. PL decay curves of complex **1b** in 2 wt% PMMA films.

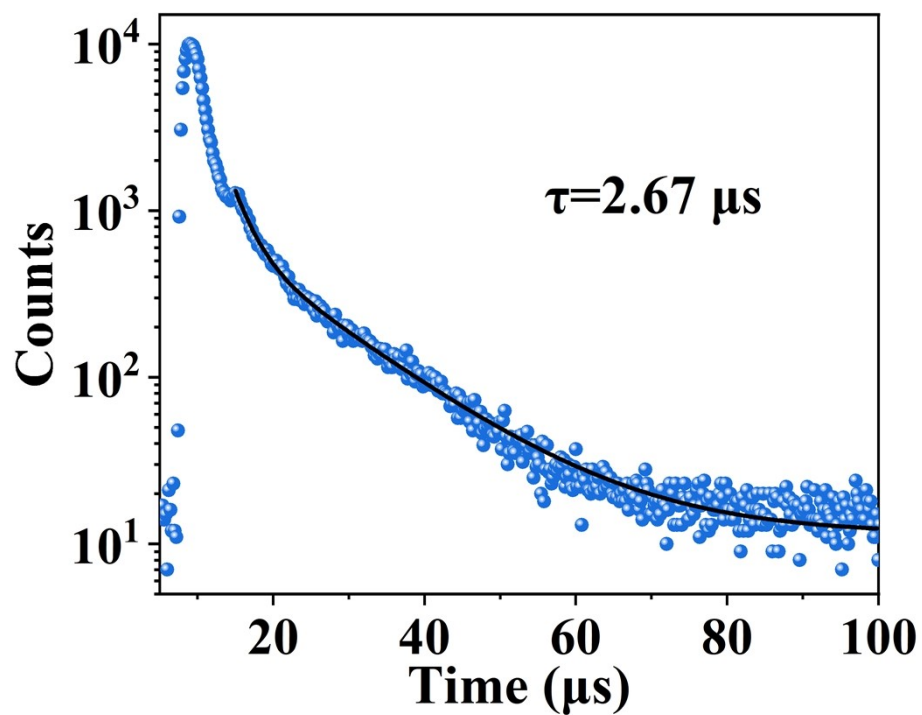

Figure S7. PL decay curves of complex 2 in solid state.

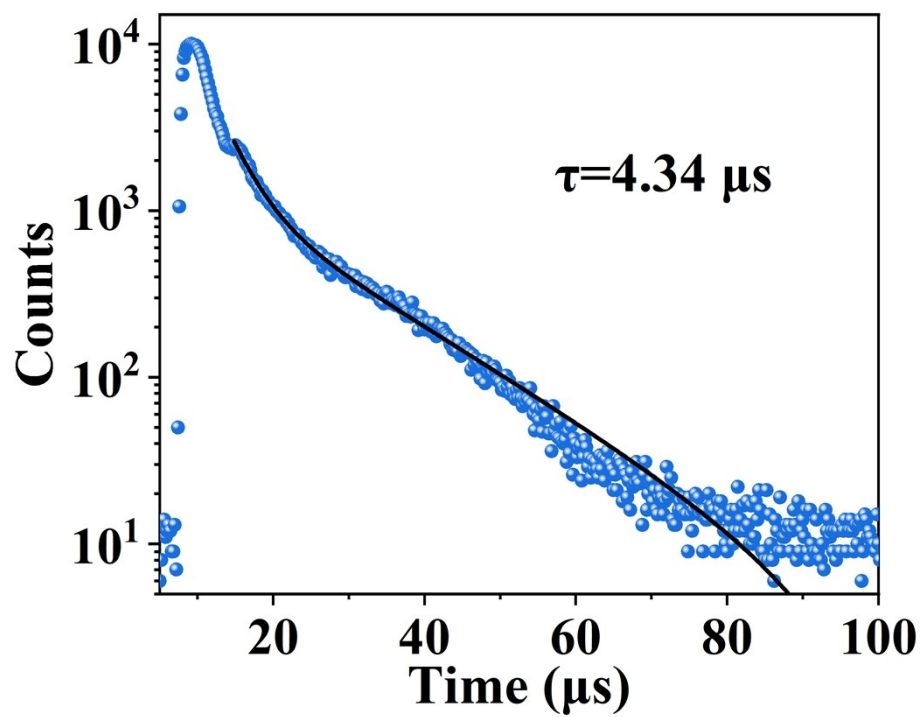

Figure S8. PL decay curves of complex 2 in 2 wt% PMMA films.

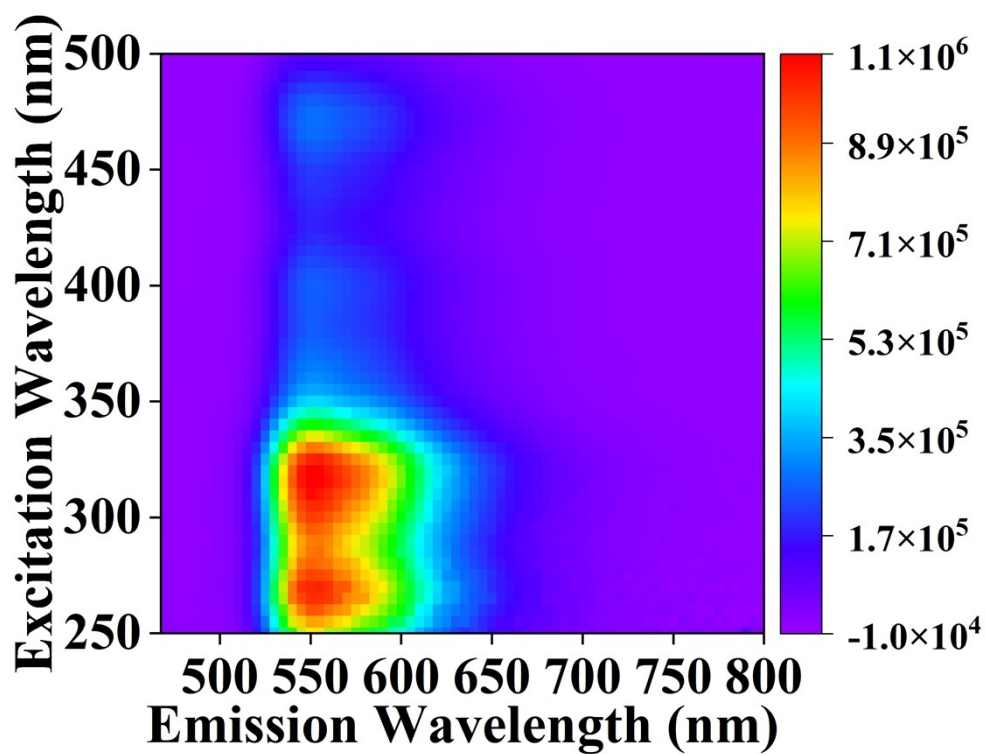

Figure S9. Two-dimension excitation-dependent emission spectra of **1a** in deoxygenated  $\text{CH}_2\text{Cl}_2$ .

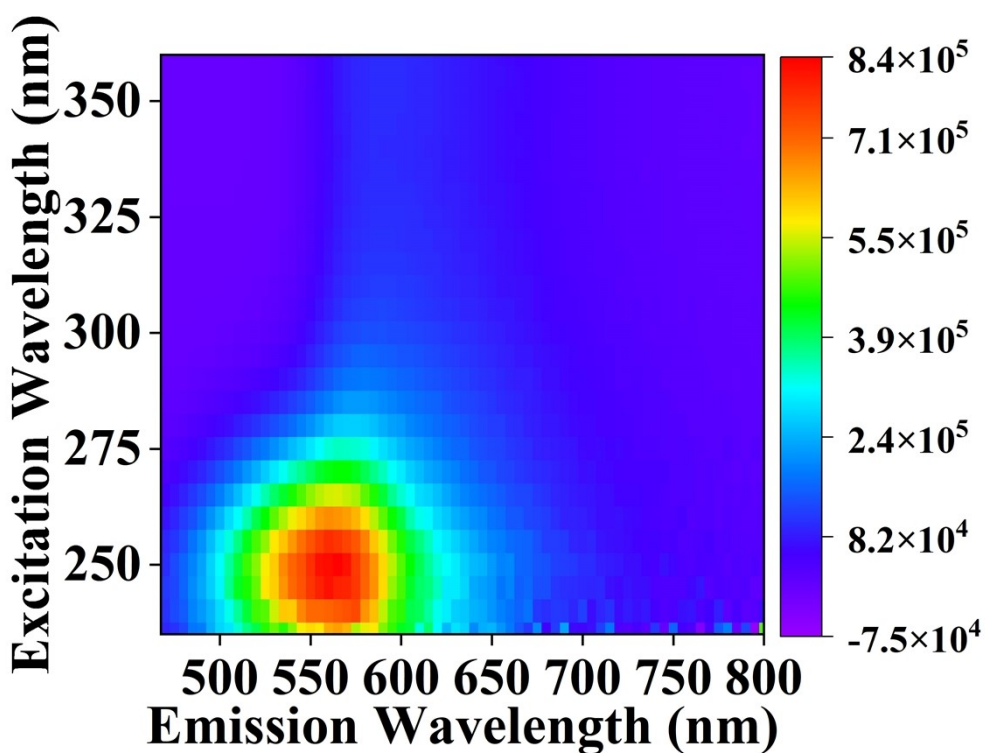

Figure S10. Two-dimension excitation-dependent emission spectra of **1a** in solid state.



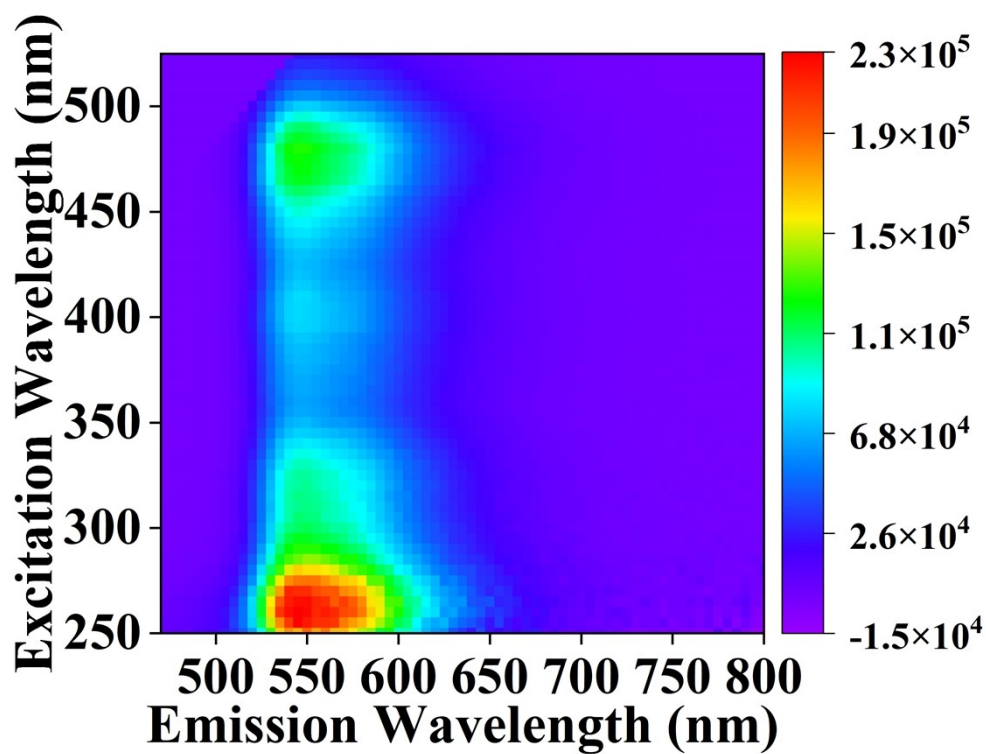

Figure S11. Two-dimension excitation-dependent emission spectra of **1a** in 2 wt% PMMA films.

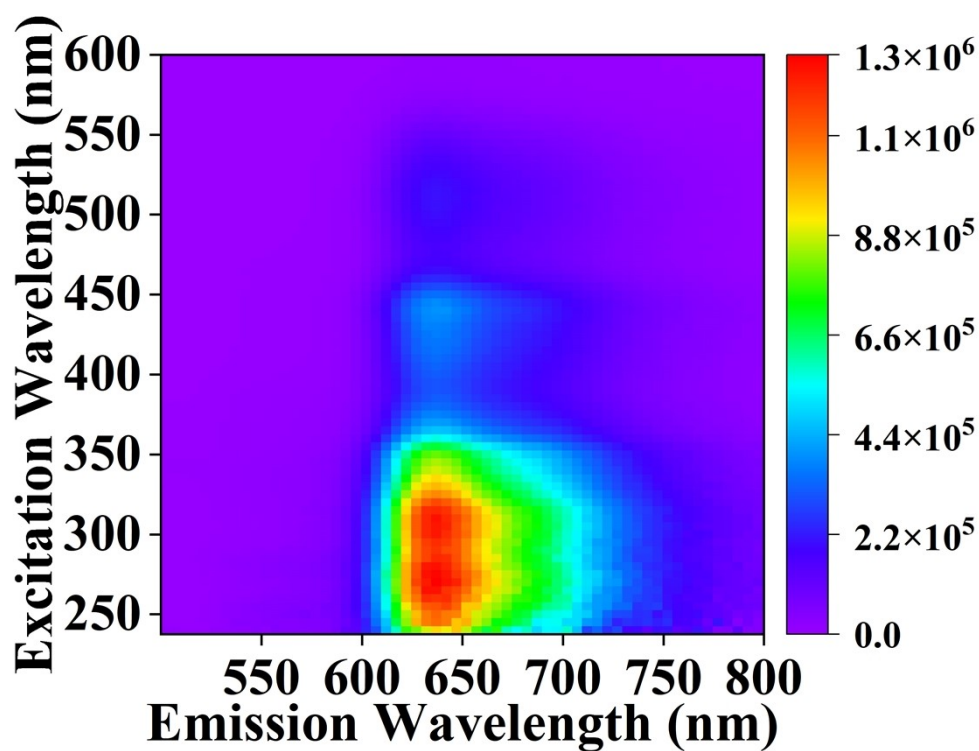

Figure S12. Two-dimension excitation-dependent emission spectra of **1b** in deoxygenated  $\text{CH}_2\text{Cl}_2$ .

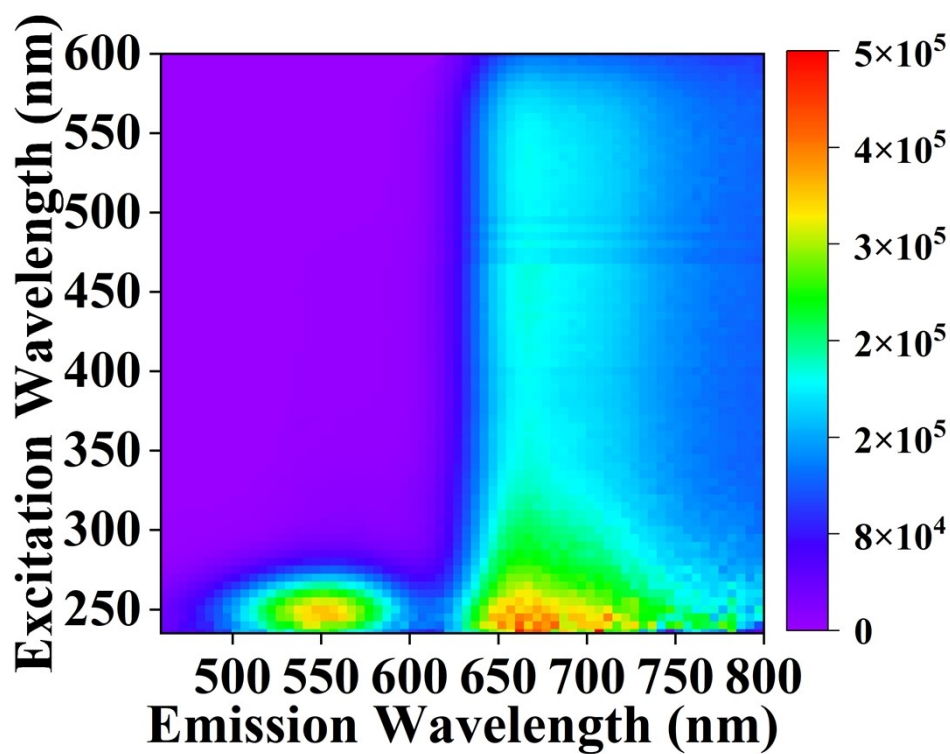

Figure S13. Two-dimension excitation-dependent emission spectra of **1b** in solid state.

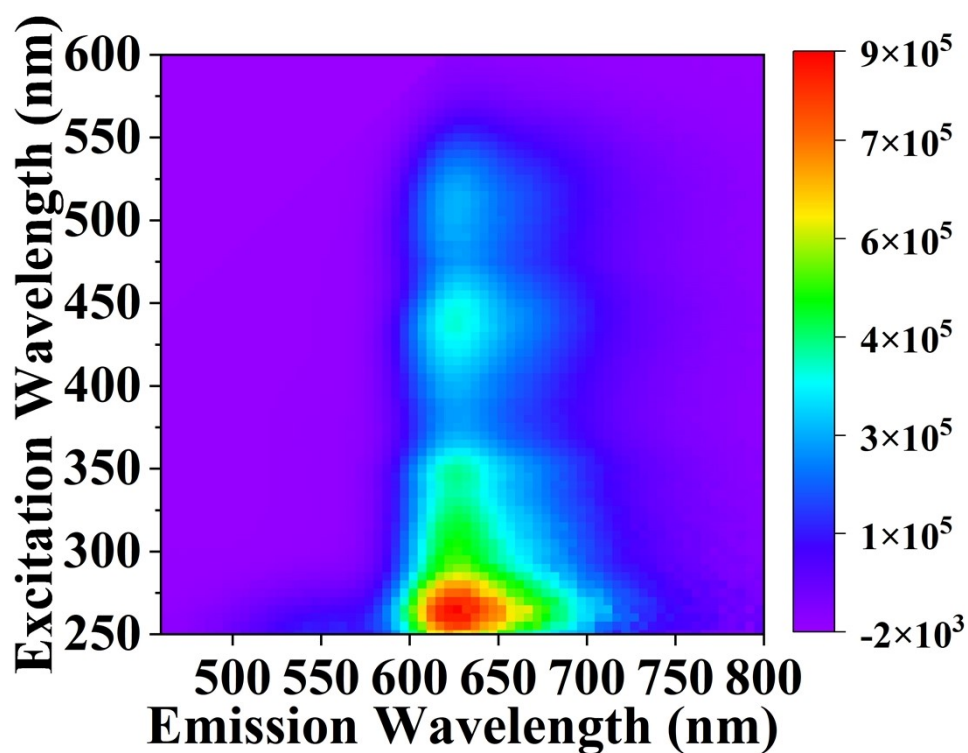

Figure S14. Two-dimension excitation-dependent emission spectra of **1b** in 2 wt% PMMA films.

### 3. NMR and ESI-Mass spectra

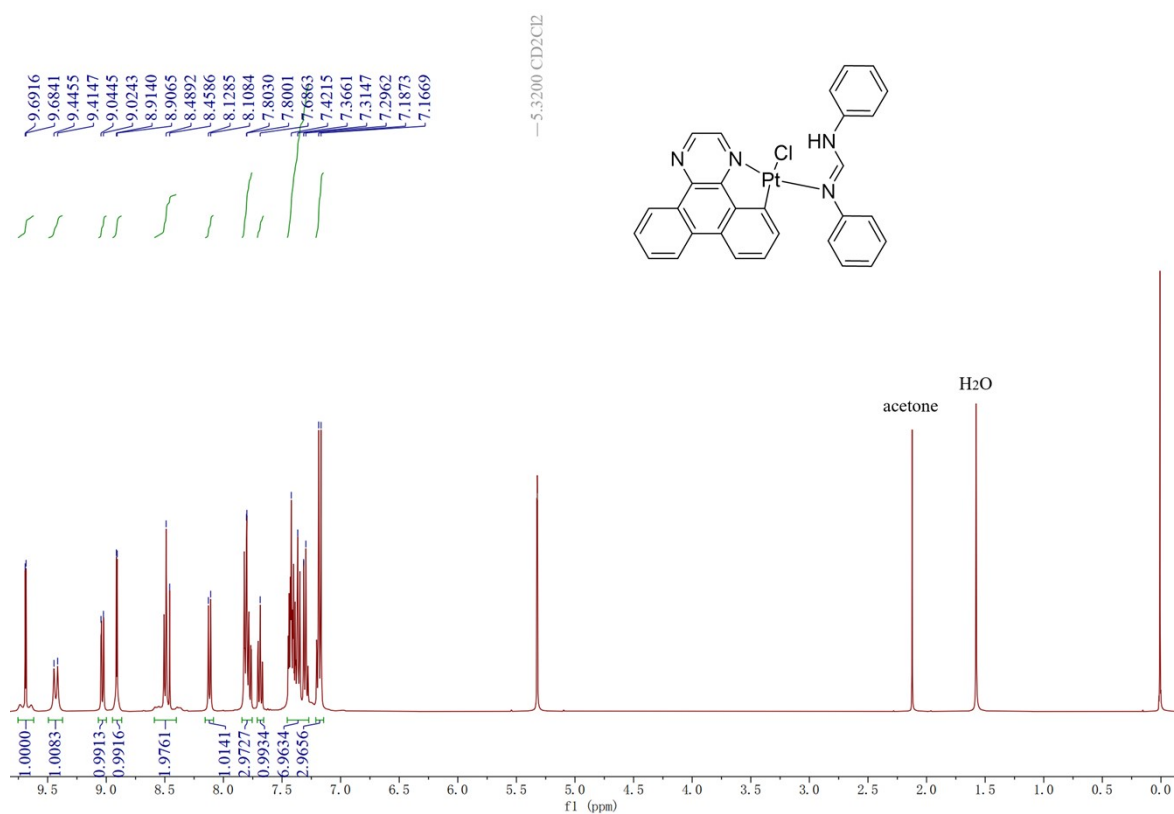

Figure S15. <sup>1</sup>H NMR spectrum of **1a** in CD<sub>2</sub>Cl<sub>2</sub>.

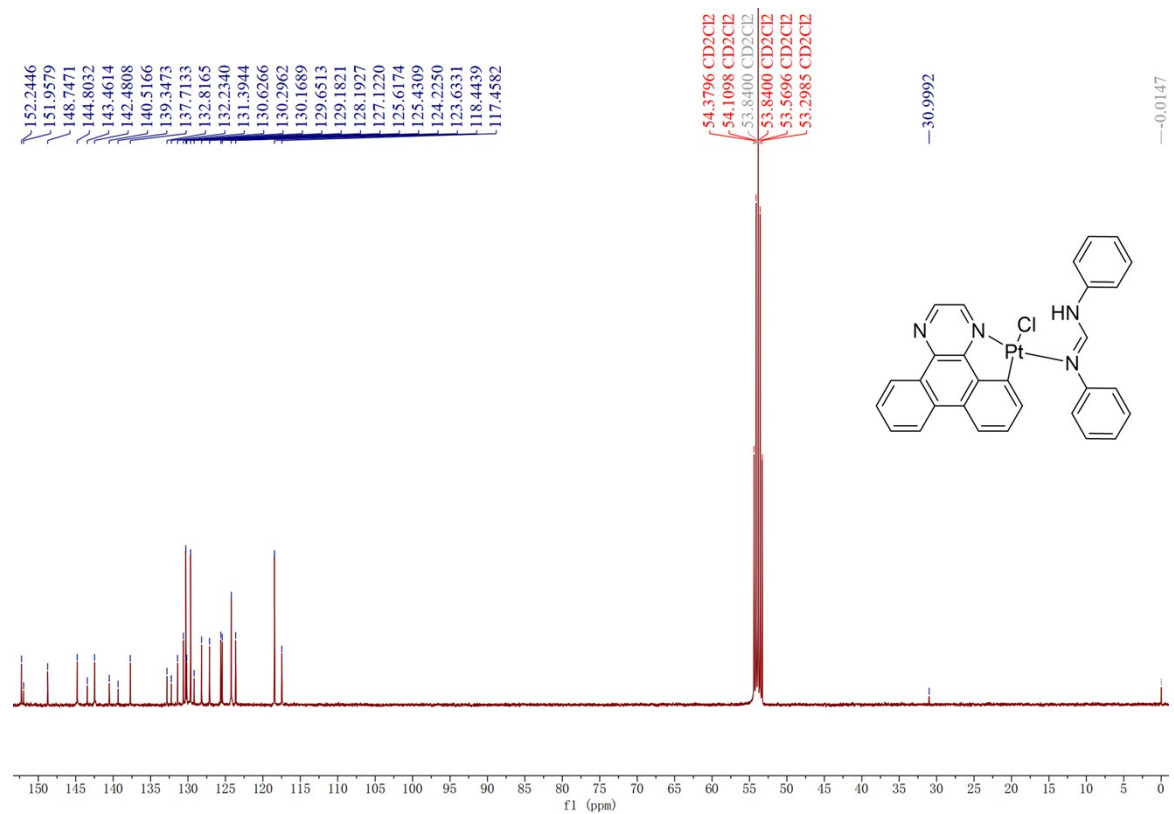

Figure S16. <sup>13</sup>C NMR spectrum of **1a** in CD<sub>2</sub>Cl<sub>2</sub>.

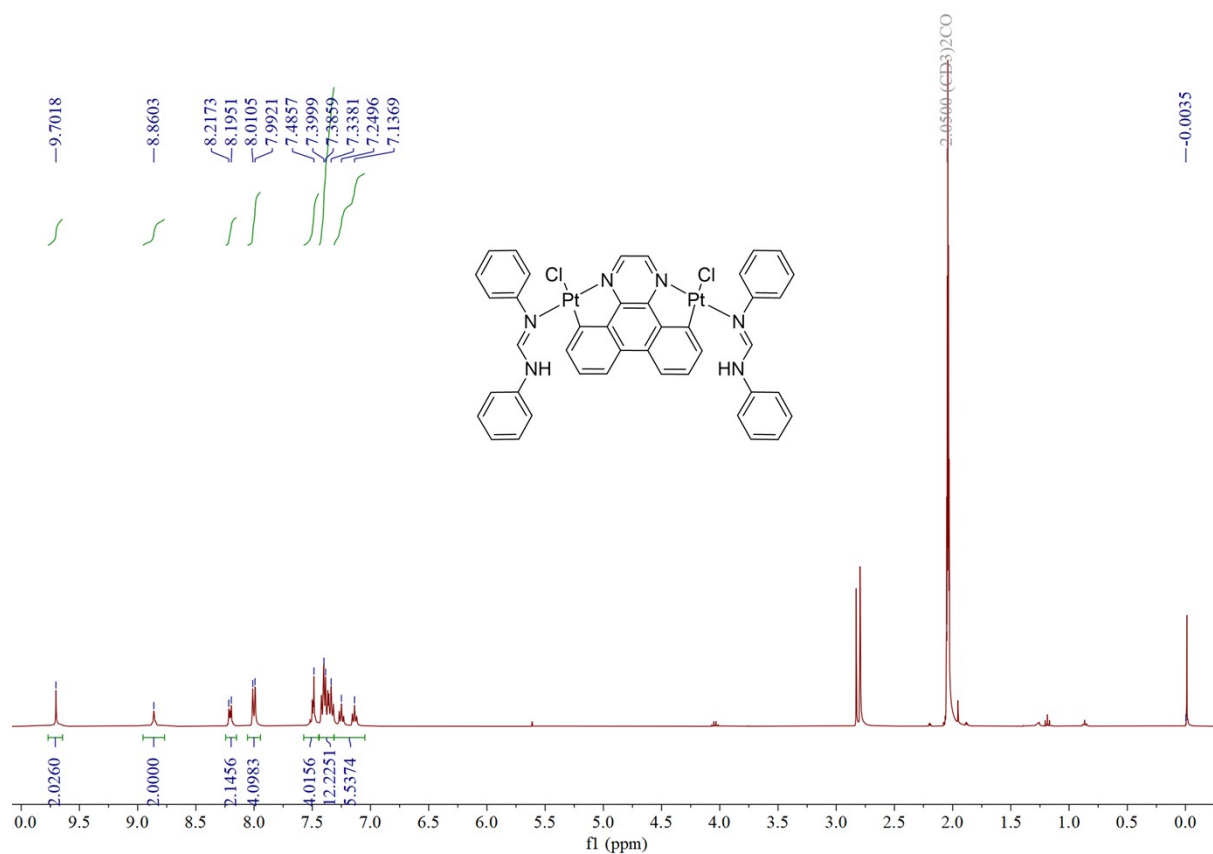

Figure S17. <sup>1</sup>H NMR spectrum of **1b** in acetone-*d*<sub>6</sub>.

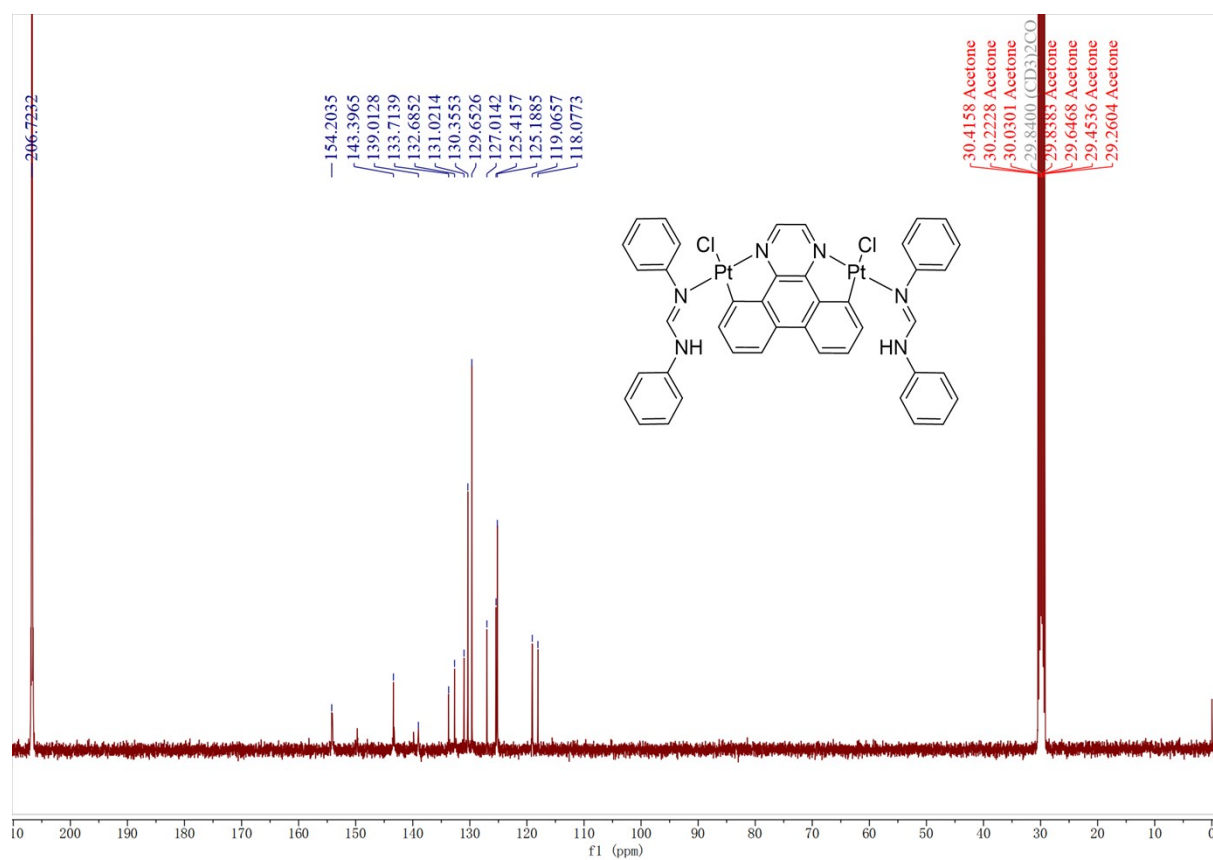

Figure S18. <sup>13</sup>C NMR spectrum of **1b** in acetone-*d*<sub>6</sub>.

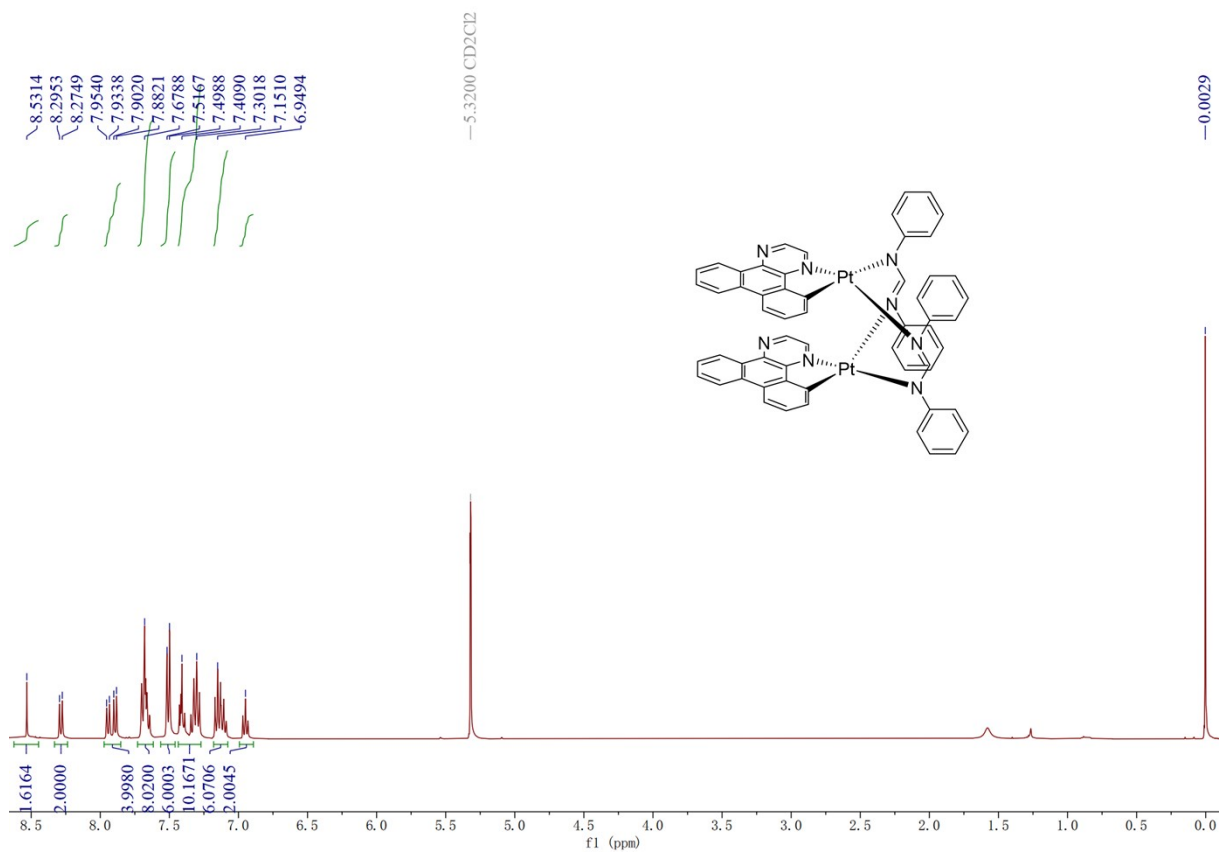

Figure S19.  $^1\text{H}$  NMR spectrum of **2** in  $\text{CD}_2\text{Cl}_2$ .

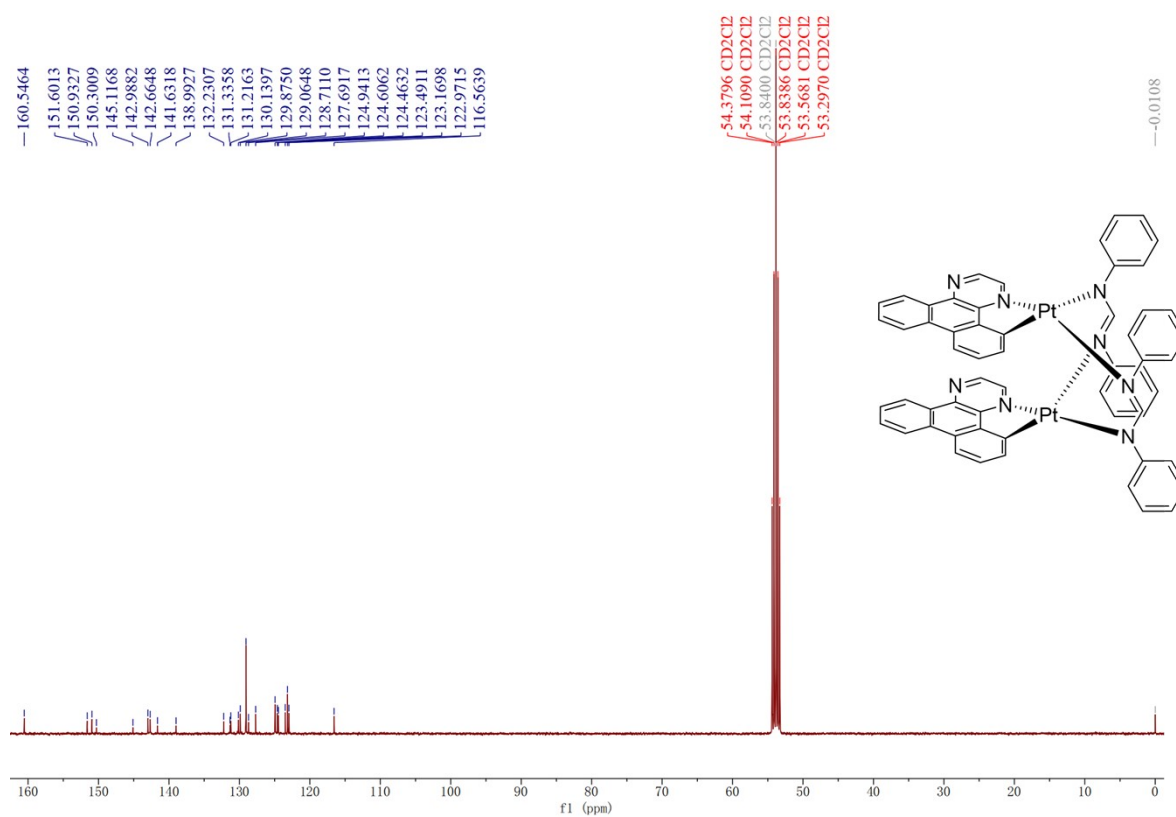

Figure S20.  $^{13}\text{C}$  NMR spectrum of **2** in  $\text{CD}_2\text{Cl}_2$ .

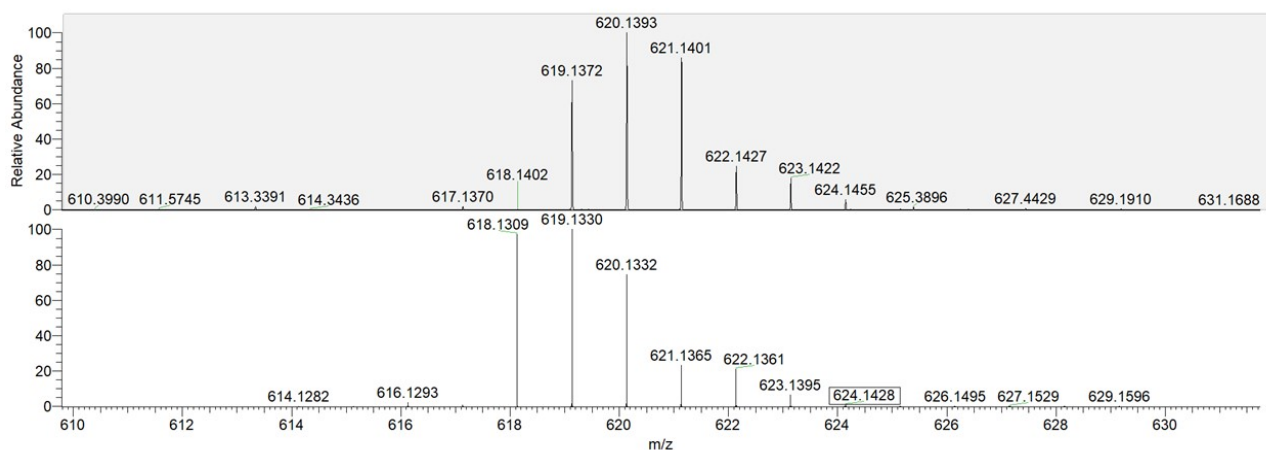

Figure S21. HR-MS spectra for 1a.

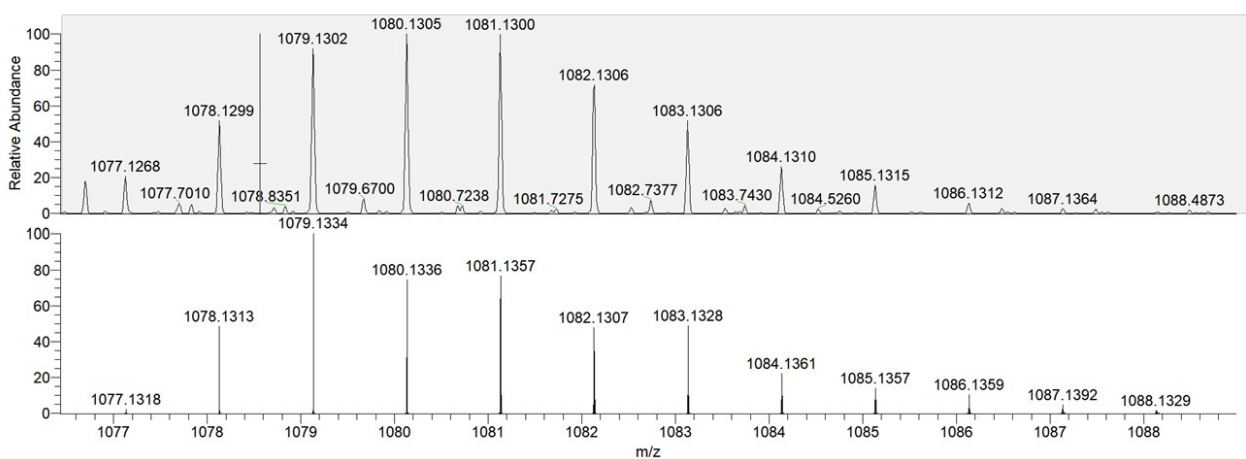

Figure S22. HR-MS spectra for 1b.

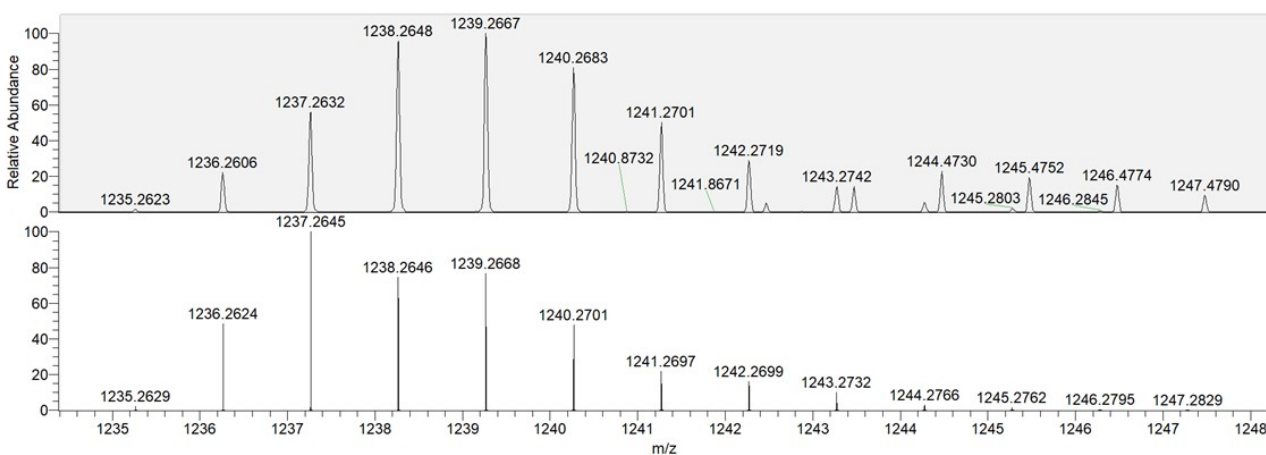

Figure S23. HR-MS spectra for 2.

## 4. Crystal data

**Table S1.** Summary of the crystal data of **1a,1b** and **2**.

|                                             | <b>1a</b>                                                            | <b>1b</b>                                                                       | <b>2</b>                                                       |
|---------------------------------------------|----------------------------------------------------------------------|---------------------------------------------------------------------------------|----------------------------------------------------------------|
| CCDC number                                 | 2309303                                                              | 2309304                                                                         | 2309305                                                        |
| Empirical formula                           | C <sub>29</sub> H <sub>21</sub> Cl N <sub>4</sub> Pt                 | C <sub>45</sub> H <sub>38</sub> Cl <sub>2</sub> N <sub>6</sub> OPt <sub>2</sub> | C <sub>58</sub> H <sub>40</sub> N <sub>8</sub> Pt <sub>2</sub> |
| Formula weight                              | 656.04                                                               | 1139.89                                                                         | 1239.16                                                        |
| Temperature/K                               | 213.00 K                                                             | 213.00 K                                                                        | 173.00 K                                                       |
| Crystal system                              | Monoclinic                                                           | Triclinic                                                                       | Triclinic                                                      |
| Space group                                 | P2 <sub>1</sub> /c                                                   | P-1                                                                             | P-1                                                            |
| a/Å                                         | 11.3936(3)                                                           | 9.8009(2)                                                                       | 15.2393(15)                                                    |
| b/Å                                         | 14.8792(4)                                                           | 14.1903(2)                                                                      | 17.0218(15)                                                    |
| c/Å                                         | 42.2998(10)                                                          | 16.5817(3)                                                                      | 21.676(2)                                                      |
| α/°                                         | 90                                                                   | 83.3520(10)                                                                     | 87.771(5)                                                      |
| β/°                                         | 94.0900(10)                                                          | 84.872(2)                                                                       | 85.211(6)                                                      |
| γ/°                                         | 90                                                                   | 73.3060(10)                                                                     | 72.665(5)                                                      |
| Volume/Å <sup>3</sup>                       | 7152.7(3)                                                            | 2190.27(8)                                                                      | 5348.0(9)                                                      |
| z                                           | 12                                                                   | 2                                                                               | 4                                                              |
| ρ <sub>calc</sub> /mm <sup>3</sup>          | 1.828                                                                | 1.728                                                                           | 1.539                                                          |
| m/mm <sup>-1</sup>                          | 8.384                                                                | 9.056                                                                           | 9.979                                                          |
| F(000)                                      | 3816.0                                                               | 1096.0                                                                          | 2400.0                                                         |
| Crystal size/mm <sup>3</sup>                | 0.09 × 0.07 × 0.05                                                   | 0.07 × 0.07 × 0.05                                                              | 0.12 × 0.11 × 0.1                                              |
| 2θ range for data collection                | 5.48 to 109.938°                                                     | 7.012 to 109.858                                                                | 4.09 to 159.829                                                |
| Index ranges                                | -13 ≤ h ≤ 13,<br>-18 ≤ k ≤ 17,<br>-50 ≤ l ≤ 51                       | -11 ≤ h ≤ 11,<br>-17 ≤ k ≤ 17,<br>-20 ≤ l ≤ 20                                  | -18 ≤ h ≤ 19,<br>-21 ≤ k ≤ 21,<br>-23 ≤ l ≤ 26                 |
| Reflections collected                       | 142743                                                               | 26819                                                                           | 50654                                                          |
| Independent reflections                     | 13545 [R <sub>(int)</sub><br>=0.0677,<br>R <sub>sigma</sub> =0.0335] | 8113 [R(int) = 0.0557,<br>R <sub>sigma</sub> = 0.0563 ]                         | 21592 [Rint = 0.0771,<br>R <sub>sigma</sub> =0.0874]           |
| Data/restraints/parameters                  | 13545/0/946                                                          | 8113/36/507                                                                     | 21592/1299/1129                                                |
| Goodness-of-fit on F <sup>2</sup>           | 1.070                                                                | 1.062                                                                           | 0.998                                                          |
| Final R indexes [I >= 2σ (I)]               | R <sub>1</sub> = 0.0420,<br>wR <sub>2</sub> = 0.1059                 | R <sub>1</sub> = 0.0440,<br>wR <sub>2</sub> = 0.1084                            | R <sub>1</sub> = 0.1357,<br>wR <sub>2</sub> = 0.3196           |
| Final R indexes [all data]                  | R <sub>1</sub> = 0.0502,<br>wR <sub>2</sub> = 0.1105                 | R <sub>1</sub> = 0.0567,<br>wR <sub>2</sub> = 0.1164                            | R <sub>1</sub> = 0.1624,<br>wR <sub>2</sub> = 0.3335           |
| Largest diff. peak/hole / e Å <sup>-3</sup> | 2.47/-2.42                                                           | 2.32/-2.20                                                                      | 2.05/-2.46                                                     |



**Table S2.** Bond lengths [Å] and angles [°] for **1a**.

|         |            |         |            |
|---------|------------|---------|------------|
| Pt1-Cl1 | 2.3658(17) | C22-C23 | 1.401(9)   |
| Pt1-N1  | 2.033(5)   | C23-C24 | 1.387(10)  |
| Pt1-N3  | 2.003(5)   | C24-C25 | 1.381(11)  |
| Pt1-C22 | 1.984(6)   | C26-C27 | 1.350(10)  |
| N1-C1   | 1.442(8)   | C27-C28 | 1.400(11)  |
| N1-C7   | 1.282(8)   | C28-C29 | 1.394(11)  |
| N2-C7   | 1.324(8)   | Pt2-Cl2 | 2.3893(17) |
| N2-C8   | 1.421(7)   | Pt2-N5  | 2.008(5)   |
| N3-C14  | 1.369(8)   | Pt2-N7  | 2.017(5)   |
| N3-C17  | 1.339(8)   | Pt2-C51 | 1.953(6)   |
| N4-C15  | 1.352(8)   | N5-C30  | 1.443(8)   |
| N4-C16  | 1.315(8)   | N5-C36  | 1.297(8)   |
| C1-C2   | 1.383(9)   | N6-C36  | 1.336(8)   |
| C1-C6   | 1.394(10)  | N6-C37  | 1.417(8)   |
| C2-C3   | 1.404(10)  | N7-C43  | 1.354(8)   |
| C3-C4   | 1.371(12)  | N7-C46  | 1.338(8)   |
| C4-C5   | 1.398(12)  | N8-C44  | 1.353(8)   |
| C5-C6   | 1.375(11)  | N8-C45  | 1.303(9)   |
| C8-C9   | 1.377(8)   | C30-C31 | 1.367(10)  |
| C8-C13  | 1.396(9)   | C30-C35 | 1.381(10)  |
| C9-C10  | 1.366(9)   | C31-C32 | 1.379(11)  |
| C10-C11 | 1.373(9)   | C32-C33 | 1.365(13)  |
| C11-C12 | 1.362(9)   | C33-C34 | 1.382(14)  |
| C12-C13 | 1.377(9)   | C34-C35 | 1.384(11)  |
| C14-C15 | 1.389(8)   | C37-C38 | 1.367(9)   |
| C14-C21 | 1.423(8)   | C37-C42 | 1.368(10)  |
| C15-C18 | 1.461(9)   | C38-C39 | 1.384(10)  |
| C16-C17 | 1.390(9)   | C39-C40 | 1.349(12)  |
| C18-C19 | 1.414(9)   | C40-C41 | 1.364(14)  |
| C18-C29 | 1.415(9)   | C41-C42 | 1.387(13)  |
| C19-C20 | 1.469(9)   | C43-C44 | 1.391(8)   |
| C19-C26 | 1.403(9)   | C43-C50 | 1.431(8)   |
| C20-C21 | 1.400(9)   | C44-C47 | 1.465(10)  |
| C20-C25 | 1.411(9)   | C45-C46 | 1.388(9)   |
| C21-C22 | 1.423(8)   | C47-C48 | 1.407(10)  |



|         |            |             |            |
|---------|------------|-------------|------------|
| C47-C58 | 1.411(9)   | C73-C76     | 1.457(8)   |
| C48-C49 | 1.458(9)   | C74-C75     | 1.379(9)   |
| C48-C55 | 1.403(10)  | C76-C77     | 1.428(9)   |
| C49-C50 | 1.394(9)   | C76-C87     | 1.404(9)   |
| C49-C54 | 1.403(9)   | C77-C78     | 1.461(9)   |
| C50-C51 | 1.455(8)   | C77-C84     | 1.407(9)   |
| C51-C52 | 1.383(8)   | C78-C79     | 1.402(8)   |
| C52-C53 | 1.387(9)   | C78-C83     | 1.400(9)   |
| C53-C54 | 1.386(10)  | C79-C80     | 1.420(8)   |
| C55-C56 | 1.395(11)  | C80-C81     | 1.370(8)   |
| C56-C57 | 1.361(13)  | C81-C82     | 1.403(9)   |
| C57-C58 | 1.370(12)  | C82-C83     | 1.379(10)  |
| Pt3-Cl3 | 2.4001(16) | C84-C85     | 1.362(10)  |
| Pt3-N9  | 2.034(5)   | C85-C86     | 1.381(11)  |
| Pt3-N11 | 2.026(5)   | C86-C87     | 1.368(10)  |
| Pt3-C80 | 1.992(6)   |             |            |
| N9-C59  | 1.423(8)   | N1-Pt1-Cl1  | 87.44(15)  |
| N9-C65  | 1.302(8)   | N3-Pt1-Cl1  | 91.97(14)  |
| N10-C65 | 1.326(9)   | N3-Pt1-N1   | 179.0(2)   |
| N10-C66 | 1.420(9)   | C22-Pt1-Cl1 | 173.25(18) |
| N11-C72 | 1.351(7)   | C22-Pt1-N1  | 98.2(2)    |
| N11-C75 | 1.326(8)   | C22-Pt1-N3  | 82.4(2)    |
| N12-C73 | 1.348(7)   | C1-N1-Pt1   | 117.3(4)   |
| N12-C74 | 1.332(8)   | C7-N1-Pt1   | 125.2(4)   |
| C59-C60 | 1.389(10)  | C7-N1-C1    | 115.8(5)   |
| C59-C64 | 1.401(9)   | C7-N2-C8    | 125.0(5)   |
| C60-C61 | 1.393(10)  | C14-N3-Pt1  | 114.6(4)   |
| C61-C62 | 1.359(12)  | C17-N3-Pt1  | 127.8(4)   |
| C62-C63 | 1.389(13)  | C17-N3-C14  | 117.6(5)   |
| C63-C64 | 1.366(11)  | C16-N4-C15  | 116.1(5)   |
| C66-C67 | 1.399(12)  | C2-C1-N1    | 119.7(6)   |
| C66-C71 | 1.361(12)  | C2-C1-C6    | 119.8(6)   |
| C67-C68 | 1.379(12)  | C6-C1-N1    | 120.4(6)   |
| C68-C69 | 1.367(16)  | C1-C2-C3    | 120.0(7)   |
| C69-C70 | 1.387(17)  | C4-C3-C2    | 119.7(7)   |
| C70-C71 | 1.374(13)  | C3-C4-C5    | 120.1(7)   |
| C72-C73 | 1.393(8)   | C6-C5-C4    | 120.3(8)   |
| C72-C79 | 1.429(8)   | C5-C6-C1    | 120.0(8)   |

|             |          |             |            |
|-------------|----------|-------------|------------|
| N1-C7-N2    | 124.9(6) | C28-C29-C18 | 119.1(7)   |
| C9-C8-N2    | 118.8(5) | N5-Pt2-Cl2  | 91.12(15)  |
| C9-C8-C13   | 119.1(6) | N5-Pt2-N7   | 174.02(19) |
| C13-C8-N2   | 122.1(5) | N7-Pt2-Cl2  | 93.42(15)  |
| C10-C9-C8   | 120.7(6) | C51-Pt2-Cl2 | 175.74(18) |
| C9-C10-C11  | 120.4(6) | C51-Pt2-N5  | 92.5(2)    |
| C12-C11-C10 | 119.4(6) | C51-Pt2-N7  | 83.1(2)    |
| C11-C12-C13 | 121.4(6) | C30-N5-Pt2  | 118.3(4)   |
| C12-C13-C8  | 119.0(6) | C36-N5-Pt2  | 124.2(4)   |
| N3-C14-C15  | 121.1(6) | C36-N5-C30  | 117.4(5)   |
| N3-C14-C21  | 114.5(5) | C36-N6-C37  | 125.3(5)   |
| C15-C14-C21 | 124.4(6) | C43-N7-Pt2  | 113.6(4)   |
| N4-C15-C14  | 121.1(6) | C46-N7-Pt2  | 128.9(4)   |
| N4-C15-C18  | 121.4(6) | C46-N7-C43  | 117.5(5)   |
| C14-C15-C18 | 117.5(6) | C45-N8-C44  | 116.0(6)   |
| N4-C16-C17  | 125.1(6) | C31-C30-N5  | 119.3(6)   |
| N3-C17-C16  | 119.0(6) | C31-C30-C35 | 120.9(7)   |
| C19-C18-C15 | 119.9(6) | C35-C30-N5  | 119.8(6)   |
| C19-C18-C29 | 120.7(6) | C30-C31-C32 | 119.9(8)   |
| C29-C18-C15 | 119.4(6) | C33-C32-C31 | 120.6(9)   |
| C18-C19-C20 | 120.1(6) | C32-C33-C34 | 119.2(8)   |
| C26-C19-C18 | 117.2(6) | C35-C34-C33 | 121.1(9)   |
| C26-C19-C20 | 122.7(6) | C30-C35-C34 | 118.4(8)   |
| C21-C20-C19 | 119.7(6) | N5-C36-N6   | 123.2(6)   |
| C21-C20-C25 | 116.7(6) | C38-C37-N6  | 119.3(6)   |
| C25-C20-C19 | 123.6(6) | C38-C37-C42 | 119.6(7)   |
| C20-C21-C14 | 118.5(6) | C42-C37-N6  | 121.0(6)   |
| C20-C21-C22 | 124.9(6) | C37-C38-C39 | 120.3(7)   |
| C22-C21-C14 | 116.5(6) | C40-C39-C38 | 120.1(8)   |
| C21-C22-Pt1 | 112.0(4) | C39-C40-C41 | 120.0(8)   |
| C23-C22-Pt1 | 132.1(5) | C40-C41-C42 | 120.5(9)   |
| C23-C22-C21 | 115.9(6) | C37-C42-C41 | 119.3(9)   |
| C24-C23-C22 | 119.7(7) | N7-C43-C44  | 120.6(6)   |
| C25-C24-C23 | 123.8(7) | N7-C43-C50  | 116.0(5)   |
| C24-C25-C20 | 119.0(6) | C44-C43-C50 | 123.4(6)   |
| C27-C26-C19 | 122.7(7) | N8-C44-C43  | 121.6(6)   |
| C26-C27-C28 | 120.3(7) | N8-C44-C47  | 120.6(6)   |
| C29-C28-C27 | 120.0(7) | C43-C44-C47 | 117.7(6)   |

|             |            |             |           |
|-------------|------------|-------------|-----------|
| N8-C45-C46  | 124.3(6)   | C60-C59-N9  | 118.4(6)  |
| N7-C46-C45  | 119.9(6)   | C60-C59-C64 | 119.0(6)  |
| C48-C47-C44 | 119.4(6)   | C64-C59-N9  | 122.5(6)  |
| C48-C47-C58 | 120.6(7)   | C61-C60-C59 | 119.1(7)  |
| C58-C47-C44 | 120.0(7)   | C62-C61-C60 | 121.5(9)  |
| C47-C48-C49 | 121.0(6)   | C61-C62-C63 | 119.4(8)  |
| C55-C48-C47 | 117.6(6)   | C64-C63-C62 | 120.3(8)  |
| C55-C48-C49 | 121.4(7)   | C63-C64-C59 | 120.6(8)  |
| C50-C49-C48 | 119.2(6)   | N9-C65-N10  | 121.5(6)  |
| C50-C49-C54 | 116.0(6)   | C67-C66-N10 | 119.8(8)  |
| C54-C49-C48 | 124.9(6)   | C71-C66-N10 | 120.7(8)  |
| C43-C50-C51 | 114.7(5)   | C71-C66-C67 | 119.5(8)  |
| C49-C50-C43 | 119.2(5)   | C68-C67-C66 | 120.8(10) |
| C49-C50-C51 | 126.0(6)   | C69-C68-C67 | 118.2(11) |
| C50-C51-Pt2 | 112.4(4)   | C68-C69-C70 | 121.9(10) |
| C52-C51-Pt2 | 134.1(5)   | C71-C70-C69 | 119.0(11) |
| C52-C51-C50 | 113.5(6)   | C66-C71-C70 | 120.6(10) |
| C51-C52-C53 | 122.2(6)   | N11-C72-C73 | 121.0(5)  |
| C52-C53-C54 | 122.3(6)   | N11-C72-C79 | 116.0(5)  |
| C53-C54-C49 | 120.0(6)   | C73-C72-C79 | 123.0(5)  |
| C56-C55-C48 | 120.1(8)   | N12-C73-C72 | 120.8(5)  |
| C57-C56-C55 | 121.8(8)   | N12-C73-C76 | 120.7(5)  |
| C56-C57-C58 | 119.7(7)   | C72-C73-C76 | 118.5(5)  |
| C57-C58-C47 | 120.2(8)   | N12-C74-C75 | 123.6(6)  |
| N9-Pt3-Cl3  | 88.30(15)  | N11-C75-C74 | 120.0(6)  |
| N11-Pt3-Cl3 | 94.49(14)  | C77-C76-C73 | 119.2(5)  |
| N11-Pt3-N9  | 174.4(2)   | C87-C76-C73 | 120.6(6)  |
| C80-Pt3-Cl3 | 174.79(18) | C87-C76-C77 | 120.2(6)  |
| C80-Pt3-N9  | 95.0(2)    | C76-C77-C78 | 120.6(5)  |
| C80-Pt3-N11 | 81.9(2)    | C84-C77-C76 | 116.8(6)  |
| C59-N9-Pt3  | 123.3(4)   | C84-C77-C78 | 122.5(6)  |
| C65-N9-Pt3  | 118.7(4)   | C79-C78-C77 | 118.9(5)  |
| C65-N9-C59  | 117.9(5)   | C83-C78-C77 | 124.9(6)  |
| C65-N10-C66 | 124.7(6)   | C83-C78-C79 | 116.2(6)  |
| C72-N11-Pt3 | 113.8(4)   | C78-C79-C72 | 119.8(5)  |
| C75-N11-Pt3 | 127.9(4)   | C78-C79-C80 | 124.7(5)  |
| C75-N11-C72 | 118.1(5)   | C80-C79-C72 | 115.6(5)  |
| C74-N12-C73 | 116.3(5)   | C79-C80-Pt3 | 112.5(4)  |

|             |          |             |          |
|-------------|----------|-------------|----------|
| C81-C80-Pt3 | 131.1(5) | C85-C84-C77 | 122.0(7) |
| C81-C80-C79 | 116.3(6) | C84-C85-C86 | 120.3(7) |
| C80-C81-C82 | 120.7(6) | C87-C86-C85 | 120.7(7) |
| C83-C82-C81 | 121.7(6) | C86-C87-C76 | 119.9(7) |
| C82-C83-C78 | 120.4(6) |             |          |

**Table S3.** Bond lengths [Å] and angles [°] for **1b**.

|         |            |         |           |
|---------|------------|---------|-----------|
| Pt1-Cl1 | 2.3846(18) | C7-C8   | 1.412(9)  |
| Pt1-N1  | 2.019(5)   | C7-C11  | 1.391(9)  |
| Pt1-N3  | 2.019(5)   | C8-C9   | 1.372(10) |
| Pt1-C1  | 2.005(6)   | C9-C10  | 1.381(10) |
| Pt2-Cl2 | 2.3863(17) | C11-C12 | 1.449(9)  |
| Pt2-N2  | 2.049(5)   | C12-C13 | 1.415(9)  |
| Pt2-N4  | 2.043(6)   | C13-C14 | 1.426(8)  |
| Pt2-C2  | 1.980(7)   | C15-C16 | 1.386(9)  |
| N1-C13  | 1.346(8)   | C17-C18 | 1.392(9)  |
| N1-C15  | 1.333(8)   | C17-C22 | 1.373(9)  |
| N2-C12  | 1.328(8)   | C18-C19 | 1.396(10) |
| N2-C16  | 1.327(8)   | C19-C20 | 1.365(10) |
| N3-C17  | 1.434(8)   | C20-C21 | 1.405(11) |
| N3-C23  | 1.281(8)   | C21-C22 | 1.367(10) |
| N4-C30  | 1.429(9)   | C24-C25 | 1.339(12) |
| N4-C36  | 1.298(10)  | C24-C29 | 1.347(11) |
| N5-C23  | 1.328(9)   | C25-C26 | 1.429(13) |
| N5-C24  | 1.431(9)   | C26-C27 | 1.398(14) |
| N6-C36  | 1.323(10)  | C27-C28 | 1.331(12) |
| N6-C37  | 1.429(9)   | C28-C29 | 1.376(11) |
| C1-C3   | 1.385(9)   | C30-C31 | 1.346(11) |
| C1-C14  | 1.401(9)   | C30-C35 | 1.409(10) |
| C2-C10  | 1.406(9)   | C31-C32 | 1.395(11) |
| C2-C11  | 1.415(9)   | C32-C33 | 1.411(12) |
| C3-C4   | 1.427(10)  | C33-C34 | 1.357(12) |
| C4-C5   | 1.372(10)  | C34-C35 | 1.379(11) |
| C5-C6   | 1.407(9)   | C37-C38 | 1.357(12) |
| C6-C7   | 1.483(9)   | C37-C42 | 1.365(12) |
| C6-C14  | 1.387(9)   | C38-C39 | 1.402(14) |

|            |            |             |           |
|------------|------------|-------------|-----------|
| C39-C40    | 1.362(16)  | C4-C5-C6    | 120.1(7)  |
| C40-C41    | 1.376(15)  | C5-C-6C7    | 123.6(6)  |
| C41-C42    | 1.380(13)  | C14-C6-C5   | 117.5(6)  |
|            |            | C14-C6-C7   | 118.9(6)  |
| N1-Pt1-Cl1 | 95.05(15)  | C8-C7-C6    | 125.0(6)  |
| N3-Pt1-Cl1 | 91.43(16)  | C11-C7-C6   | 119.9(6)  |
| N3-Pt1-N1  | 173.5(2)   | C11-C7-C8   | 115.1(6)  |
| C1-Pt1-Cl1 | 177.22(19) | C9-C8-C7    | 120.2(6)  |
| C1-Pt1-N1  | 82.3(2)    | C8-C9-C10   | 122.5(6)  |
| C1-Pt1-N3  | 91.3(2)    | C9-C10-C2   | 121.2(6)  |
| N2-Pt2-Cl2 | 91.87(15)  | C2-C11-C12  | 112.8(6)  |
| N4-Pt2-Cl2 | 92.74(16)  | C7-C11-C2   | 127.1(6)  |
| N4-Pt2-N2  | 175.4(2)   | C7-C11-C12  | 120.1(6)  |
| C2-Pt2-Cl2 | 173.96(18) | N2-C12-C11  | 119.2(6)  |
| C2-Pt2-N2  | 82.2(2)    | N2-C12-C13  | 121.0(6)  |
| C2-Pt2-N4  | 93.2(2)    | C13-C12-C11 | 119.6(6)  |
| C13-N1-Pt1 | 111.9(4)   | N1-C13-C12  | 121.0(6)  |
| C15-N1-Pt1 | 131.6(4)   | N1-C13-C14  | 118.9(5)  |
| C15-N1-C13 | 116.5(5)   | C12-C13-C14 | 120.1(6)  |
| C12-N2-Pt2 | 111.6(4)   | C1-C14-C13  | 114.0(6)  |
| C16-N2-Pt2 | 130.8(4)   | C6-C14-C1   | 124.7(6)  |
| C16-N2-C12 | 117.6(5)   | C6-C14-C13  | 121.3(6)  |
| C17-N3-Pt1 | 120.1(4)   | N1-C15-C16  | 122.2(6)  |
| C23-N3-Pt1 | 120.5(5)   | N2-C16-C15  | 121.6(6)  |
| C23-N3-C17 | 119.1(6)   | C18-C17-N3  | 118.0(5)  |
| C30-N4-Pt2 | 120.2(5)   | C22-C17-N3  | 123.7(6)  |
| C36-N4-Pt2 | 121.1(5)   | C22-C17-C18 | 118.3(6)  |
| C36-N4-C30 | 118.7(6)   | C17-C18-C19 | 119.9(7)  |
| C23-N5-C24 | 125.0(6)   | C20-C19-C18 | 121.1(7)  |
| C36-N6-C37 | 127.0(7)   | C19-C20-C21 | 118.8(7)  |
| C3-C1-Pt1  | 130.8(5)   | C22-C21-C20 | 119.7(7)  |
| C3-C1-C14  | 116.2(6)   | C21-C22-C17 | 122.2(7)  |
| C14-C1-Pt1 | 112.9(5)   | N3-C23-N5   | 123.4(6)  |
| C10-C2-Pt2 | 132.2(5)   | C25-C24-N5  | 116.7(8)  |
| C10-C2-C11 | 113.8(6)   | C25-C24-C29 | 120.8(8)  |
| C11-C2-Pt2 | 114.0(4)   | C29-C24-N5  | 122.5(7)  |
| C1-C3-C4   | 120.8(6)   | C24-C25-C26 | 119.3(10) |
| C5-C4-C3   | 120.6(6)   | C27-C26-C25 | 118.9(10) |

|             |          |             |           |
|-------------|----------|-------------|-----------|
| C28-C27-C26 | 118.7(9) | C34-C35-C30 | 118.7(8)  |
| C27-C28-C29 | 121.9(8) | N4-C36-N6   | 123.2(7)  |
| C24-C29-C28 | 120.4(8) | C38-C37-N6  | 122.3(8)  |
| C31-C30-N4  | 121.6(7) | C38-C37-C42 | 119.8(8)  |
| C31-C30-C35 | 119.2(8) | C42-C37-N6  | 117.9(8)  |
| C35-C30-N4  | 119.1(7) | C37-C38-C39 | 120.3(10) |
| C30-C31-C32 | 122.7(8) | C40-C39-C38 | 119.8(11) |
| C31-C32-C33 | 117.7(8) | C39-C40-C41 | 119.2(10) |
| C34-C33-C32 | 119.4(8) | C40-C41-C42 | 120.7(10) |
| C33-C34-C35 | 122.3(8) | C37-C42-C41 | 120.0(10) |

**Table S4.** Bond lengths [Å] and angles [°] for **2**.

|         |            |         |           |
|---------|------------|---------|-----------|
| Pt1-N2  | 1.93(2)    | C4-C5   | 1.36(3)   |
| Pt1-N3  | 2.064(18)  | C6-C5   | 1.446(9)  |
| Pt1-N7  | 2.07(2)    | C6-C7   | 1.446(9)  |
| Pt1-C6  | 1.935(17)  | C8-C7   | 1.446(9)  |
| Pt2-Pt1 | 2.8439(15) | C9-C8   | 1.446(9)  |
| Pt2-N4  | 2.023(19)  | C9-C10  | 1.446(9)  |
| Pt2-N5  | 2.04(2)    | C10-C5  | 1.446(9)  |
| Pt2-N8  | 2.112(18)  | C10-C11 | 1.40(3)   |
| Pt2-C21 | 2.07(2)    | C11-C12 | 1.405(10) |
| N1-C2   | 1.42(3)    | C13-C12 | 1.405(10) |
| N1-C3   | 1.35(3)    | C14-C13 | 1.405(10) |
| N2-C1   | 1.35(3)    | C14-C15 | 1.405(10) |
| N2-C4   | 1.35(3)    | C16-C11 | 1.405(10) |
| N3-C46  | 1.435(19)  | C16-C15 | 1.405(10) |
| N3-C52  | 1.42(3)    | C17-N5  | 1.34(3)   |
| N4-C52  | 1.19(2)    | C17-C18 | 1.40(3)   |
| N7-C39  | 1.24(3)    | C18-N6  | 1.41(3)   |
| N7-C40  | 1.45(2)    | C19-N5  | 1.42(3)   |
| N8-C33  | 1.39(2)    | C19-C32 | 1.36(3)   |
| N8-C39  | 1.41(3)    | C20-C19 | 1.54(3)   |
| C1-C2   | 1.47(4)    | C20-C25 | 1.32(3)   |
| C3-C16  | 1.47(3)    | C21-C20 | 1.23(3)   |
| C4-C3   | 1.50(4)    | C21-C22 | 1.31(3)   |

|         |          |             |           |
|---------|----------|-------------|-----------|
| C22-C23 | 1.45(3)  | N2-Pt1-Pt2  | 97.7(6)   |
| C24-C23 | 1.28(3)  | N2-Pt1-N3   | 95.1(8)   |
| C25-C24 | 1.49(3)  | N2-Pt1-N7   | 174.5(7)  |
| C25-C26 | 1.46(3)  | N2-Pt1-C6   | 81.6(7)   |
| C27-C26 | 1.406(9) | N3-Pt1-Pt2  | 80.5(5)   |
| C27-C28 | 1.406(9) | N3-Pt1-N7   | 89.9(8)   |
| C29-C28 | 1.406(9) | N7-Pt1-Pt2  | 80.8(5)   |
| C29-C30 | 1.406(9) | C6-Pt1-Pt2  | 98.6(5)   |
| C31-C26 | 1.406(9) | C6-Pt1-N3   | 176.5(7)  |
| C31-C30 | 1.406(9) | C6-Pt1-N7   | 93.3(6)   |
| C31-C32 | 1.44(3)  | N4-Pt2-Pt1  | 82.6(6)   |
| C32-N6  | 1.52(3)  | N4-Pt2-N5   | 91.7(7)   |
| C34-C33 | 1.3900   | N4-Pt2-N8   | 90.3(7)   |
| C35-C34 | 1.3900   | N4-Pt2-C21  | 171.6(8)  |
| C36-C35 | 1.3900   | N5-Pt2-Pt1  | 98.7(8)   |
| C37-C36 | 1.3900   | N5-Pt2-N8   | 177.7(8)  |
| C38-C33 | 1.3900   | N5-Pt2-C21  | 81.1(9)   |
| C38-C37 | 1.3900   | N8-Pt2-Pt1  | 82.6(5)   |
| C40-C45 | 1.3900   | C21-Pt2-Pt1 | 94.2(7)   |
| C41-C40 | 1.3900   | C21-Pt2-N8  | 96.9(8)   |
| C42-C41 | 1.3900   | C3-N1-C2    | 114(2)    |
| C43-C42 | 1.3900   | C1-N2-Pt1   | 129.0(18) |
| C43-C44 | 1.3900   | C4-N2-Pt1   | 115.4(16) |
| C45-C44 | 1.3900   | C4-N2-C1    | 115(2)    |
| C46-C47 | 1.3900   | C46-N3-Pt1  | 124.0(14) |
| C47-C48 | 1.3900   | C52-N3-Pt1  | 119.3(13) |
| C48-C49 | 1.3900   | C52-N3-C46  | 116.4(16) |
| C50-C49 | 1.3900   | C52-N4-Pt2  | 123.6(19) |
| C50-C51 | 1.3900   | C52-N4-C53  | 118(2)    |
| C51-C46 | 1.3900   | C53-N4-Pt2  | 117.5(12) |
| C53-N4  | 1.51(2)  | C17-N5-Pt2  | 126.6(18) |
| C54-C53 | 1.3900   | C17-N5-C19  | 122(2)    |
| C54-C55 | 1.3900   | C19-N5-Pt2  | 111.0(15) |
| C55-C56 | 1.3900   | C18-N6-C32  | 114(2)    |
| C56-C57 | 1.3900   | C39-N7-Pt1  | 127.0(17) |
| C57-C58 | 1.3900   | C39-N7-C40  | 117(2)    |
| C58-C53 | 1.3900   | C40-N7-Pt1  | 115.9(14) |
|         |          | C33-N8-Pt2  | 125.6(13) |

|             |           |             |           |
|-------------|-----------|-------------|-----------|
| C33-N8-C39  | 115.3(17) | C21-C20-C25 | 131(2)    |
| C39-N8-Pt2  | 119.1(14) | C25-C20-C19 | 113(2)    |
| N2-C1-C2    | 122(2)    | C20-C21-Pt2 | 116.3(17) |
| N1-C2-C1    | 122(2)    | C20-C21-C22 | 119(2)    |
| N1-C3-C4    | 121(2)    | C22-C21-Pt2 | 124.6(19) |
| N1-C3-C16   | 122(2)    | C21-C22-C23 | 117(2)    |
| C16-C3-C4   | 116(2)    | C24-C23-C22 | 124(2)    |
| N2-C4-C3    | 124(2)    | C23-C24-C25 | 115(2)    |
| N2-C4-C5    | 116(2)    | C20-C25-C24 | 114(2)    |
| C5-C4-C3    | 120(2)    | C20-C25-C26 | 128(2)    |
| C4-C5-C6    | 113.7(15) | C26-C25-C24 | 117.3(19) |
| C4-C5-C10   | 120.8(16) | C27-C26-C25 | 122.8(15) |
| C10-C5-C6   | 125.4(16) | C31-C26-C25 | 117.7(15) |
| C5-C6-Pt1   | 112.8(10) | C31-C26-C27 | 119.1(18) |
| C7-C6-Pt1   | 132.4(11) | C28-C27-C26 | 120.7(18) |
| C7-C6-C5    | 114.7(15) | C27-C28-C29 | 116.6(18) |
| C8-C7-C6    | 117.8(17) | C28-C29-C30 | 125.4(19) |
| C9-C8-C7    | 128.7(19) | C31-C30-C29 | 114.0(19) |
| C8-C9-C10   | 111.2(18) | C26-C31-C32 | 116.7(15) |
| C9-C10-C5   | 121.1(18) | C30-C31-C26 | 122.6(18) |
| C11-C10-C5  | 121.6(14) | C30-C31-C32 | 119.8(16) |
| C11-C10-C9  | 117.0(12) | C19-C32-N6  | 115(2)    |
| C10-C11-C12 | 120.3(15) | C19-C32-C31 | 124(2)    |
| C10-C11-C16 | 118.9(13) | C31-C32-N6  | 121(2)    |
| C16-C11-C12 | 120(2)    | N8-C33-C34  | 115.2(13) |
| C13-C12-C11 | 114(2)    | N8-C33-C38  | 124.7(13) |
| C12-C13-C14 | 130(2)    | C34-C33-C38 | 120.0     |
| C15-C14-C13 | 111(2)    | C35-C34-C33 | 120.0     |
| C14-C15-C16 | 123.5(19) | C34-C35-C36 | 120.0     |
| C11-C16-C3  | 121.7(17) | C35-C36-C37 | 120.0     |
| C11-C16-C15 | 120(2)    | C36-C37-C38 | 120.0     |
| C15-C16-C3  | 117.4(17) | C37-C38-C33 | 120.0     |
| N5-C17-C18  | 115(2)    | N7-C39-N8   | 123(2)    |
| C17-C18-N6  | 128(2)    | C41-C40-N7  | 120.3(15) |
| N5-C19-C20  | 115(2)    | C41-C40-C45 | 120.0     |
| C32-C19-N5  | 125(2)    | C45-C40-N7  | 119.7(15) |
| C32-C19-C20 | 120(2)    | C42-C41-C40 | 120.0     |
| C21-C20-C19 | 116(2)    | C43-C42-C41 | 120.0     |



|             |           |             |           |
|-------------|-----------|-------------|-----------|
| C42-C43-C44 | 120.0     | C46-C51-C50 | 120.0     |
| C45-C44-C43 | 120.0     | N4-C52-N3   | 127(2)    |
| C44-C45-C40 | 120.0     | C54-C53-N4  | 119.5(14) |
| C47-C46-N3  | 116.7(13) | C58-C53-N4  | 119.9(14) |
| C51-C46-N3  | 122.8(13) | C58-C53-C54 | 120.0     |
| C51-C46-C47 | 120.0     | C55-C54-C53 | 120.0     |
| C46-C47-C48 | 120.0     | C56-C55-C54 | 120.0     |
| C49-C48-C47 | 120.0     | C55-C56-C57 | 120.0     |
| C48-C49-C50 | 120.0     | C56-C57-C58 | 120.0     |
| C51-C50-C49 | 120.0     | C53-C58-C57 | 120.0     |

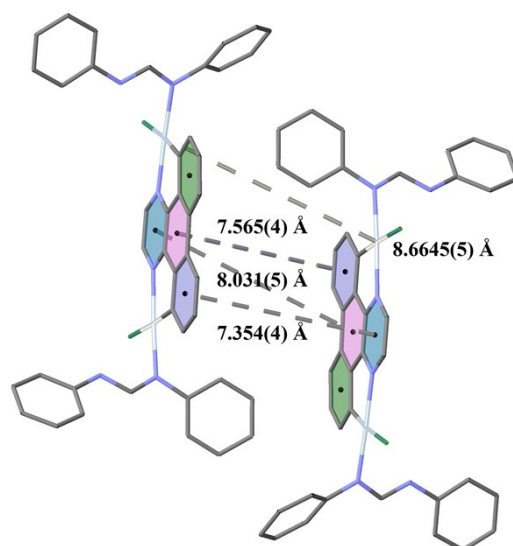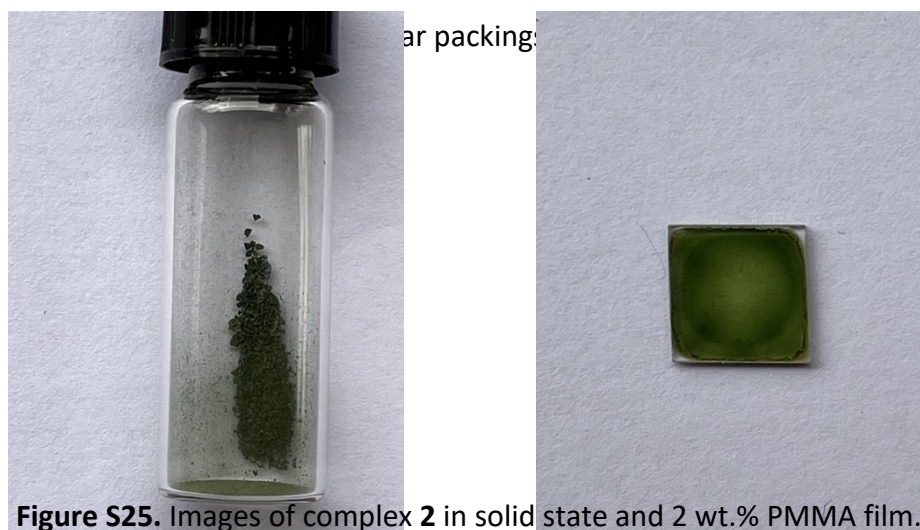

Figure S25. Images of complex **2** in solid state and 2 wt.% PMMA film.

## 5. References

1. B. An, Z. G. Wang, L. C. Yang and X. P. Li, *Journal of Applied Spectroscopy*, 2017, **84**, 555-559.
